# Supplementary material
Source: publisher figshare collection journal article supplement (https://acs.figshare.com/ndownloader/files/8974633)
Supplement: Supplementary file 1 [file 8974633]

---

# **Bioinspired and Biomimetic AgNPs/gentamicin-embedded Silk Fibroin Coatings for Robust Antibacterial and Osteogenetic Applications**

Wenhao Zhou<sup>a</sup>, Zhaojun Jia<sup>a</sup>, Pan Xiong<sup>a</sup>, Jianglong Yan<sup>a</sup>, Yangyang Li<sup>a</sup>, Ming Li<sup>c</sup>, Yan Cheng<sup>a,\*</sup>,  
Yufeng Zheng<sup>a,b</sup>

<sup>a</sup>*Academy for Advanced Interdisciplinary Studies, Peking University, Beijing 100871, China*

<sup>b</sup>*Department of Advanced Materials and Nanotechnology, College of Engineering, Peking University, Beijing 100871, China*

<sup>c</sup>*China-America Institute of Neuroscience, Xuanwu Hospital, Capital Medical University, Beijing, 100053, China*

## **\*Corresponding author**

Y. Cheng, Ph. D.

Academy for Advanced Interdisciplinary Studies,

Peking University, Beijing 100871, China

Tel&Fax: 0086-10-6275 3404

E-mail: [chengyan@pku.edu.cn](mailto:chengyan@pku.edu.cn)

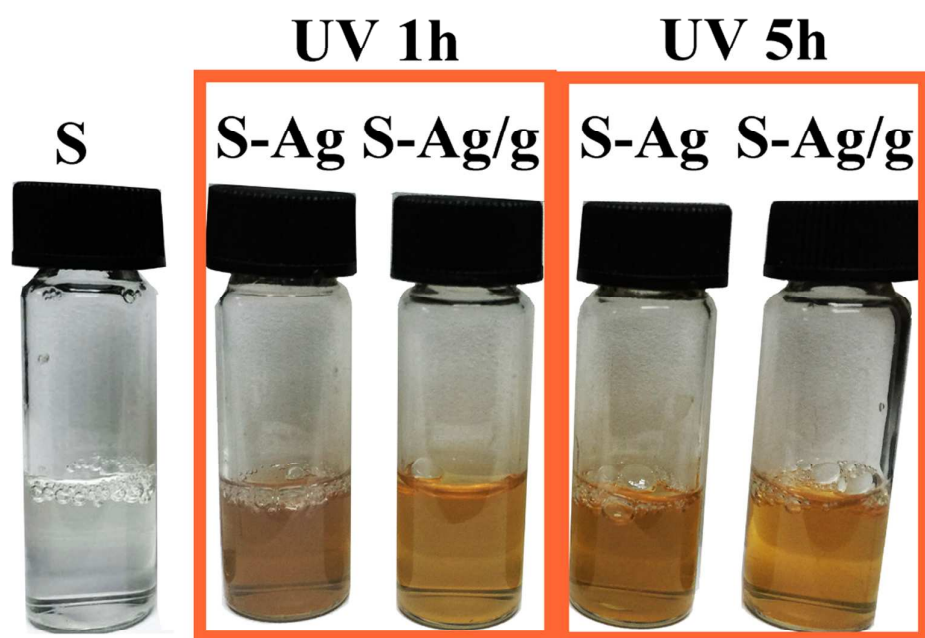

**Fig. S1.** Color change of different composite solutions under UV irradiation.

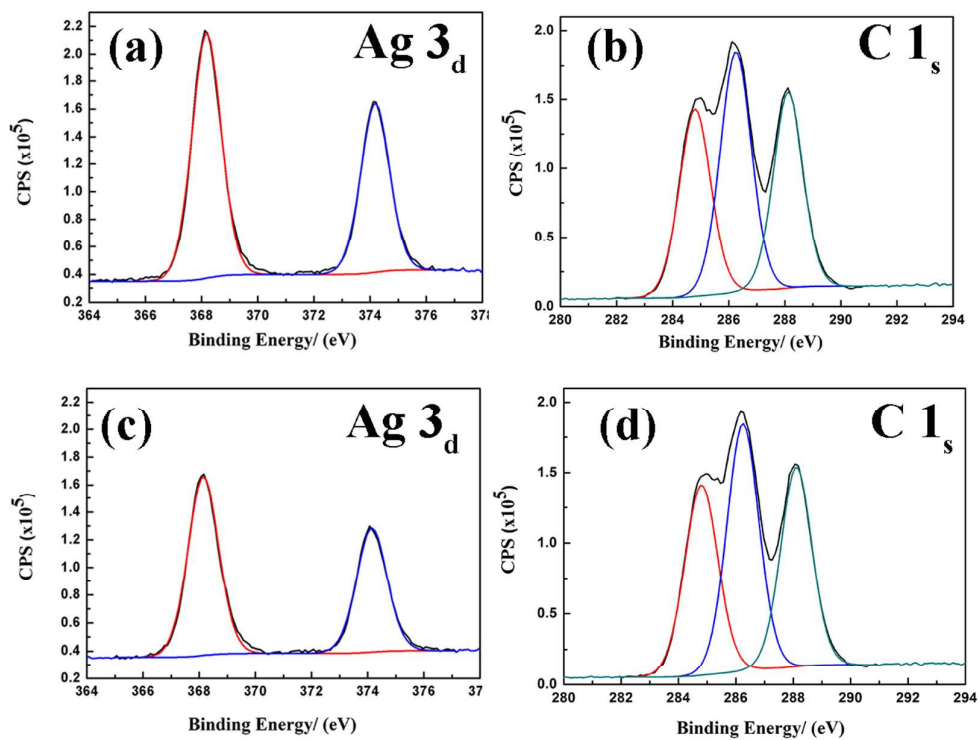

**Fig. S2.** Corresponding core-level spectra for Ag 3d and C 1s of Ti-PD-S-Ag (a, c) and Ti-PD-S-Ag/g (b, d).

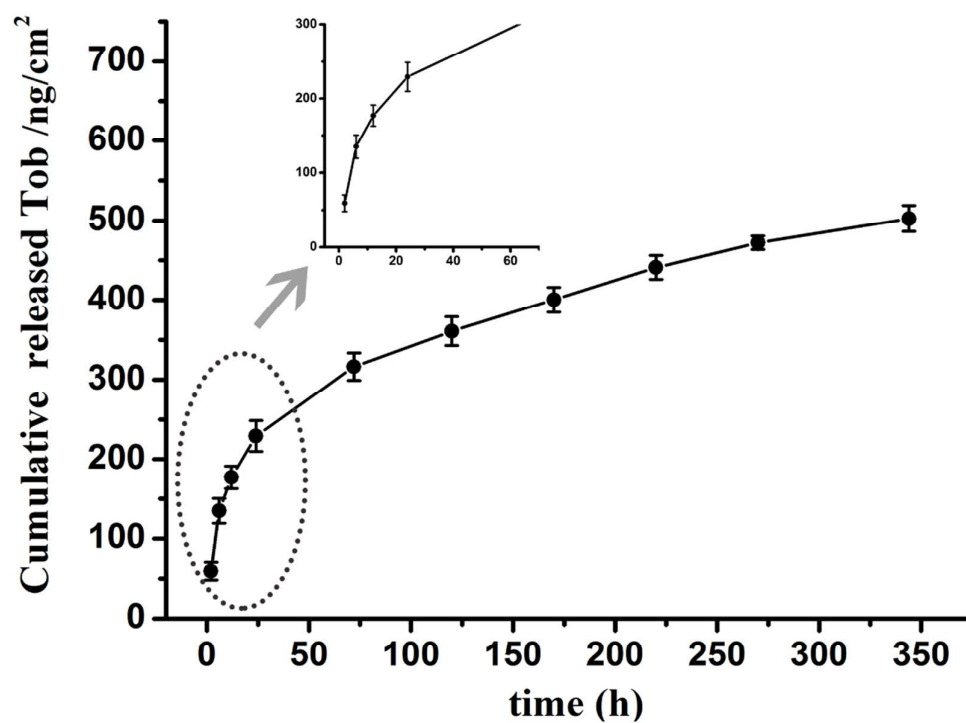

**Fig. S3.** The release behavior of Gen in PBS.

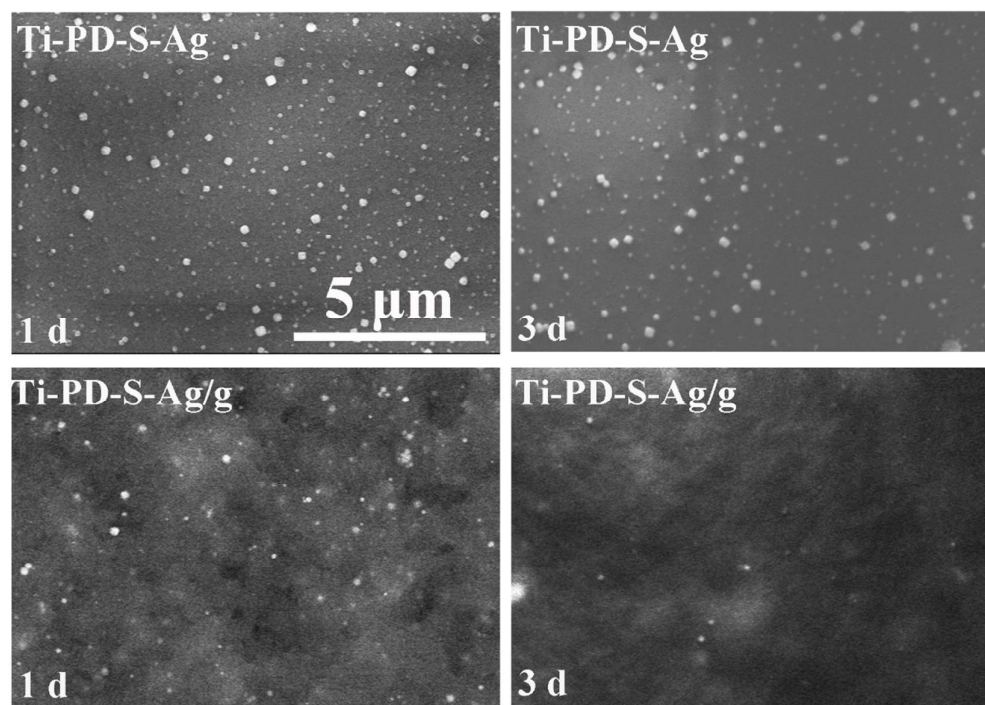

**Fig. S4.** SEM images of samples immersed for 1, 3 and 30 d respectively.

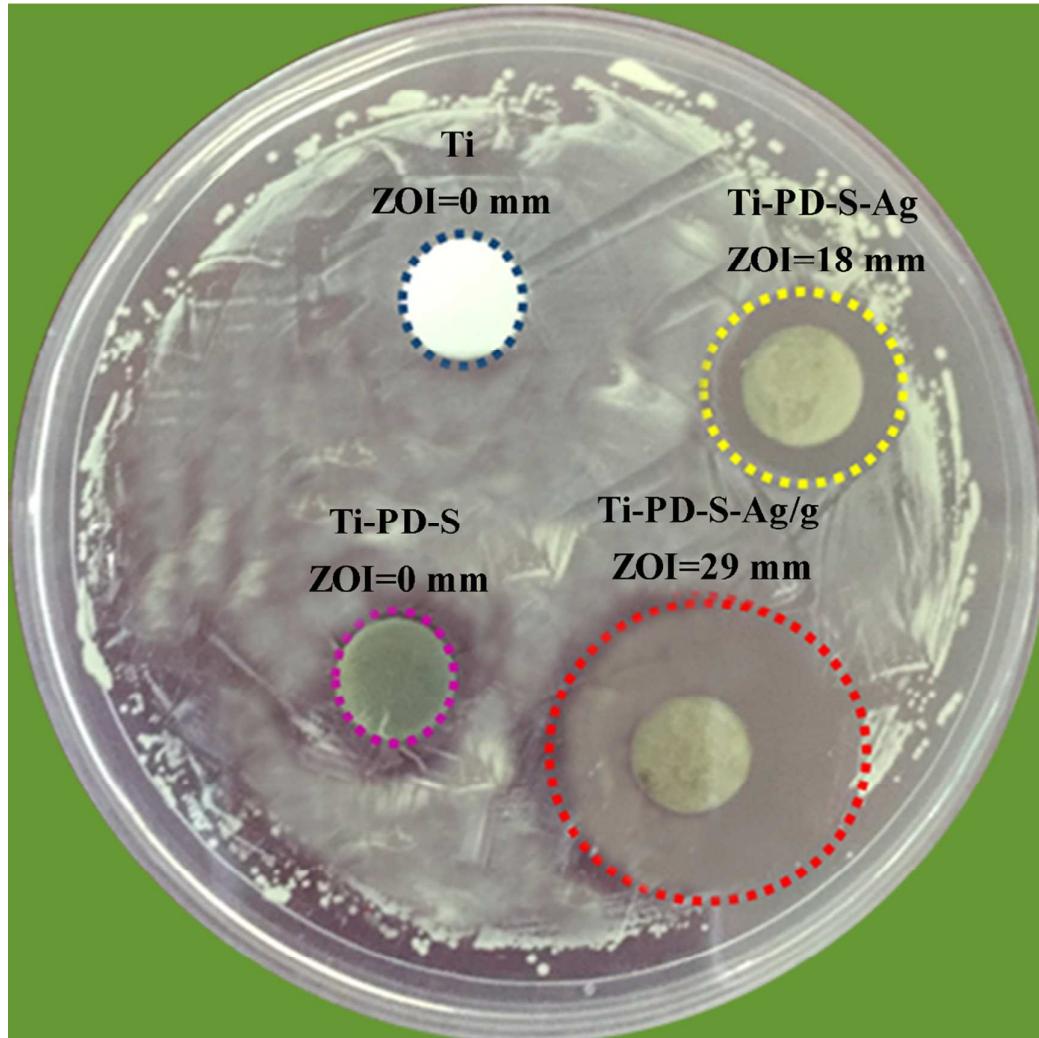

**Fig. S5.** Inhibitory zones for the samples against *S. aureus*.

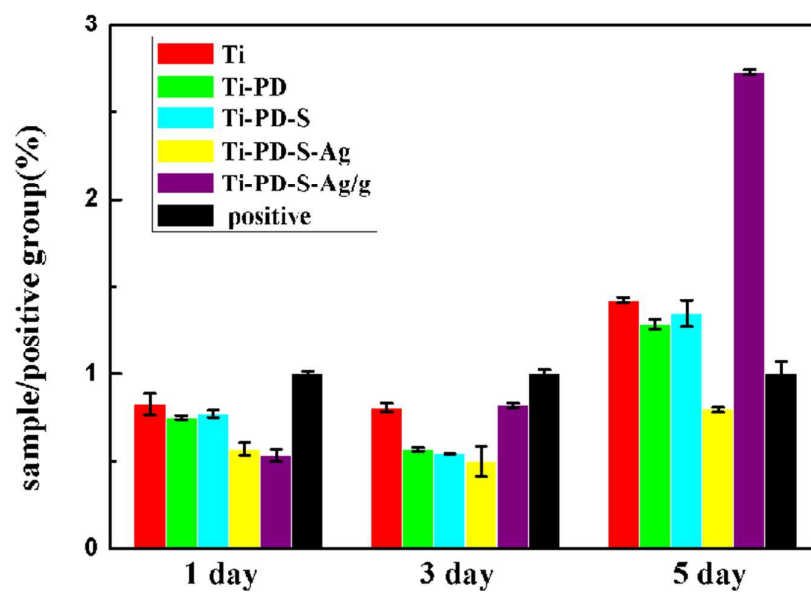

**Fig. S6.** Cell viability of MCT3T co-cultured with *S. aureus* ( $1 \times 10^5$  CFU/mL) on various surfaces for 1 d, 3 d and 5 d.

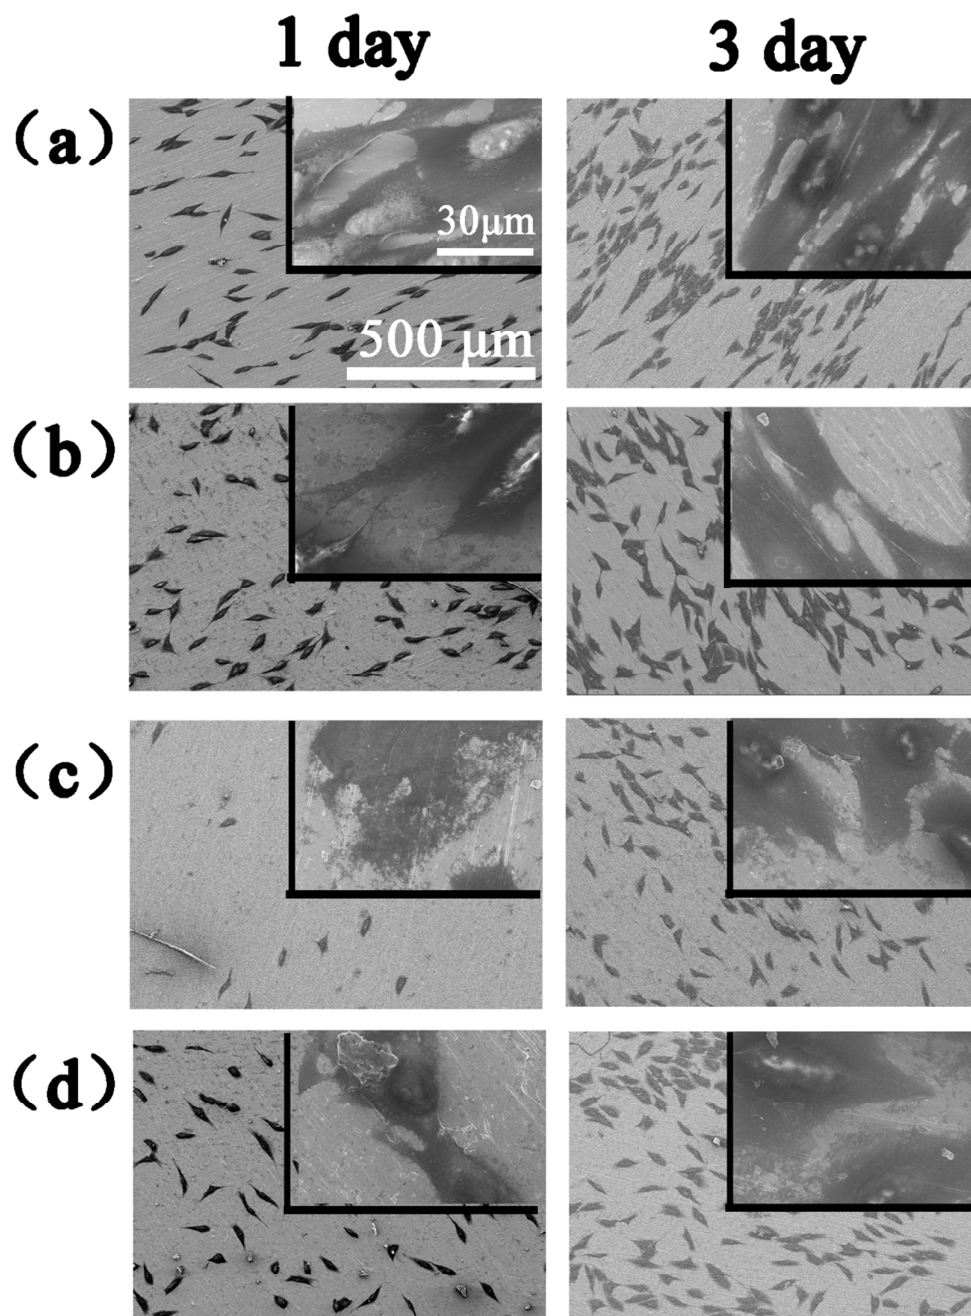

**Fig. S7.** The interfacial interplay between MC3T3 cells and (a) Ti, (b) Ti-PD-S, (c) Ti-PD-S-Ag and (d) Ti-PD-S-Ag/g.
